# Supplementary material
Source: ML conference proceedings conference paper supplement (https://openreview.net/forum?id=ktXW9g2i8r)
Supplement: supplementary_material [file dea supp.pdf › dea supp.pdf]

# DIRECTIONAL ENSEMBLE AGGREGATION FOR ACTOR-CRITICS

**Anonymous authors**

Paper under double-blind review

## ABSTRACT

Reliable  $Q$ -value estimation is central to off-policy reinforcement learning in continuous control. Standard actor-critic methods often address overestimation bias by aggregating ensembles of  $Q$ -values conservatively, for example by taking their minimum. While effective at reducing bias, these static rules discard useful information, cannot adapt to training dynamics, and generalize poorly across learning regimes. We propose Directional Ensemble Aggregation (DEA), a fully learnable aggregation method that replaces static aggregation with a dynamic mechanism capable of interpolating between conservative and explorative strategies as training progresses. DEA introduces two learnable directional parameters, one regulating critic conservatism and the other guiding actor exploration. Both are learned using disagreement-weighted Bellman errors, where updates depend only on the sign of each sample’s error. This decoupled design allows DEA to adjust automatically to task-specific uncertainty, ensemble size, and update frequency in a data-driven manner. Empirically, DEA generalizes across MuJoCo and DeepMind Control Suite benchmarks in both interactive and sample-efficient learning regimes.

## 1 INTRODUCTION

Off-policy Reinforcement Learning (RL) has become a powerful framework for solving continuous control tasks, with actor-critics forming a central class (Mnih et al., 2013; 2015). These methods decompose training into two components: a *critic* ( $Q$ -function), which estimates the expected returns, and an *actor*, which uses these  $Q$ -value estimates to optimize its policy (Haarnoja et al., 2018a).

A central challenge in actor-critics is *overestimation bias* in  $Q$ -value estimation (Thrun & Schwartz, 1993), where value estimates drift upward because positive noise is repeatedly amplified through bootstrapping and the maximization operator (Fujimoto et al., 2018). Such bias can destabilize training and lead to suboptimal policies (Van Hasselt, 2010; Van Hasselt et al., 2016), especially in continuous control, where even small biases in  $Q$ -values may be exploited by the actor. Another challenge is *sample efficiency*. A common remedy is to increase the number of updates per environment interaction, known as the Update-To-Data (UTD) ratio (Chen et al., 2021). However, higher UTD ratios place greater demands on the accuracy of  $Q$ -values, as repeated updates per environment step can amplify estimation errors and further destabilize training (Nikishin et al., 2022).

To mitigate overestimation, many algorithms employ an ensemble of critics and aggregate their  $Q$ -value estimates conservatively, typically by taking the minimum across the ensemble (Fujimoto et al., 2018; Haarnoja et al., 2018a; Ciosek et al., 2019; Chen et al., 2021). While effective in reducing bias, these static aggregation rules have several drawbacks. First, they impose unnecessary restrictions that prevent smooth interpolation between conservative and explorative strategies, hindering fine-grained control over the exploration-exploitation trade-off. Second, they collapse ensemble diversity into a single value, discarding useful information. Third, they remain fixed throughout training, unable to adapt to task-specific demands or the evolving reliability of  $Q$ -value estimates. This rigidity also extends to policy optimization, where the actor is constrained to the same static aggregation rule regardless of the environment’s exploration demands or the stage of training.

Furthermore, most existing algorithms are designed with a specific *learning regime*, defined by particular combinations of UTD ratios and ensemble sizes. For example, *interactive learning* typically employs low UTD ratios and small ensembles with frequent environment interactions (Fujimoto et al., 2018; Haarnoja et al., 2018a; Ciosek et al., 2019; Moskovitz et al., 2021). Conversely, *sample-efficient*

*learning* relies on higher UTD ratios and larger ensembles to minimize the number of interactions required to learn a task (Chen et al., 2021; Wu et al., 2022; Cetin & Celiktutan, 2023). Algorithms optimized for one learning regime often fail in the other: increasing the UTD ratio in methods designed for interactive learning can introduce instability and degrade performance (Nikishin et al., 2022), whereas methods optimized for sample-efficient learning tend to underperform in low-UTD scenarios due to insufficient utilization of available updates (Liang et al., 2022; Chen et al., 2021).

**Our approach.** We propose Directional Ensemble Aggregation (DEA), a fully learnable aggregation method for actor-critic algorithms that adapts dynamically to task demands and uncertainty levels. DEA overcomes the rigidity of existing methods that are tailored to specific learning regimes, enabling generalization across settings where static rules often fail. At its core, DEA replaces static rules with a data-driven mechanism that interpolates between conservative and explorative strategies as training progresses.

A key feature of DEA is its decoupled aggregation, introducing two learnable parameters:  $\bar{\kappa}$ , used to construct what guides critic learning, and  $\kappa$ , to construct what guides actor learning. Separate parameters are essential because, especially under high uncertainty, critics often benefit from more conservative estimates to reduce overestimation bias, while actors can exploit more optimistic estimates when uncertainty is low to encourage exploration.

These parameters are learned directly from data through some weighted Bellman objectives, with updates depending only on the *sign* of each sample’s error. The sign reliably indicates whether an estimate overshoots or undershoots its target, while ignoring noisy magnitudes that could otherwise cause disproportionate updates. By relying on this directional signal, DEA avoids drastic parameter swings and achieves stable, data-driven adaptation of aggregation. This reliance on error direction motivates the name *directional* ensemble aggregation.

Across a broad set of continuous control benchmarks in MuJoCo and the DeepMind Control Suite, DEA consistently demonstrates strong generalization by maintaining reliable learning dynamics and outperforming static ensemble aggregation methods in both interactive and sample-efficient settings.

## 2 PRELIMINARY

We denote by  $\mathcal{P}(\Omega)$  the set of all probability distributions over a space  $\Omega$ , and by  $\mathcal{B}(\Omega)$  the set of bounded real-valued functions on  $\Omega$ . For  $N \in \mathbb{N}$ , we write  $[N]$  for  $\{1, \dots, N\}$ .

**Markov Decision Processes (MDPs).** We consider an infinite-horizon MDP defined by the tuple  $\mathcal{M} = \langle \mathcal{S}, \mathcal{A}, p, p_0, r, \gamma \rangle$  (Puterman, 2014), where  $\mathcal{S}$  and  $\mathcal{A}$  are continuous state and action spaces. The transition dynamics are governed by an unknown probability density  $p(s'|s, a)$  over next states  $s' \in \mathcal{S}$  given a current state-action pair  $(s, a) \in \mathcal{S} \times \mathcal{A}$ . The initial state is drawn from a distribution  $p_0 \in \mathcal{P}(\mathcal{S})$ , and rewards are given by a bounded function  $r : \mathcal{S} \times \mathcal{A} \rightarrow [0, B_r]$ , with  $B_r > 0$ . The discount factor  $\gamma \in (0, 1]$  controls the importance of future rewards.

**Policies.** Let  $\Pi = \{\pi : \mathcal{S} \rightarrow \mathcal{P}(\mathcal{A})\}$  denote the set of stochastic policies. Under a policy  $\pi \in \Pi$ , the agent interacts with the MDP iteratively: at each time step  $t \in \mathbb{N}$ , the agent observes a state  $s_t \in \mathcal{S}$ , samples an action  $a_t \sim \pi(\cdot|s_t)$ , receives a reward  $r(s_t, a_t)$ , and transitions to a next state  $s_{t+1} \sim p(\cdot|s_t, a_t)$ . For convenience, we define the one-step policy-induced transition distribution as  $p^\pi(s', a'|s, a) = p(s'|s, a)\pi(a'|s')$ .

**Maximum entropy RL.** The objective is to find a policy  $\pi$  that maximizes the expected discounted return,  $J(\pi) = \mathbb{E}_\pi[\sum_{t=0}^{\infty} \gamma^t r(s_t, a_t)]$  with  $s_0 \sim p_0$  (Sutton & Barto, 2018; Bertsekas & Tsitsiklis, 1996). To encourage exploration, we consider the maximum entropy RL framework (Ziebart, 2010; Haarnoja et al., 2017; 2018a), where the agent aims to maximize both the expected return and the entropy of the policy. This is formalized by the objective:  $J_\alpha(\pi) = \mathbb{E}_\pi[\sum_{t=0}^{\infty} \gamma^t (r(s_t, a_t) + \alpha \mathcal{H}(\pi(\cdot|s_t)))]$ , where  $\alpha > 0$  controls the trade-off between reward and entropy, and the entropy term is defined as  $\mathcal{H}(\pi(\cdot|s)) = -\mathbb{E}_{a \sim \pi(\cdot|s)}[\log \pi(a|s)]$ . Haarnoja et al. (2018b) proposed automatic entropy tuning by adjusting  $\alpha$  to minimize the objective  $J(\alpha) = \mathbb{E}_{a \sim \pi(\cdot|s)}[\log(\alpha) \cdot (-\log \pi(a|s) - \mathcal{H}_{\text{target}})]$  during each policy update. This objective increases  $\alpha$  when the current policy entropy is below the target  $\mathcal{H}_{\text{target}}$ , and to decrease

when it is above. In practice, the target entropy  $\mathcal{H}_{\text{target}}$  is typically set heuristically, proportional to  $-\dim(\mathcal{A})$  or  $-\dim(\mathcal{A})/2$  (Haarnoja et al., 2018b; Chen et al., 2021). The state-action value function  $Q^\pi : \mathcal{S} \times \mathcal{A} \rightarrow \mathbb{R}$  under policy  $\pi$  satisfies  $Q^\pi(s, a) = J_\alpha(\pi)$  starting from  $s_0 = s$  and  $a_0 = a$  (Watkins & Dayan, 1992; Haarnoja et al., 2017).

### 3 SOFT ACTOR-CRITIC METHODS

A widely used framework for maximum entropy RL is the class of soft actor-critic methods, where the agent jointly learns a  $Q$ -value function (the critic) and a policy (the actor). The active *critic*  $Q$  estimates the state-action value function  $Q^\pi$  (following policy  $\pi$ ) by minimizing the Bellman error (Silver et al., 2014; Bertsekas & Tsitsiklis, 1996; Haarnoja et al., 2018a):

$$\arg \min_Q \mathbb{E}_{(s,a,r,s') \sim \mathcal{D}} [(Q(s, a) - y(s, a, r, s'))^2], \quad (1)$$

where the samples  $(s, a, r, s')$  are drawn from a replay buffer  $\mathcal{D}$ , and the critic’s *target value*  $y(s, a, r, s')$  is defined as:

$$y(s, a, r, s') = r(s, a) + \gamma[\bar{Q}(s', a') - \alpha \log \pi(a'|s')], \quad a' \sim \pi(\cdot|s'), \quad (2)$$

with  $\bar{Q}$  denoting the *target critic* that may differ from the active critic  $Q$  (Mnih et al., 2015). The *actor* is trained to find a policy  $\pi \in \Pi$  that maximizes the expected entropy-regularized value:

$$\arg \max_{\pi \in \Pi} \mathbb{E}_{a \sim \pi(\cdot|s)} [\tilde{Q}(s, a) - \alpha \log \pi(a|s)], \quad (3)$$

where  $\tilde{Q}$  is a separate *actor-update critic* used solely for training the actor, and may differ from both the active critic  $Q$  and the target critic  $\bar{Q}$ .

Note that  $\bar{Q}$  and  $\tilde{Q}$  are *references*:  $\bar{Q}$  guides critic learning (in (2)), while  $\tilde{Q}$  guides actor learning (in (3)). Although they are not the critic or actor themselves, their construction strongly affects stability, bias, and training success. Thus, when we later describe the critic or actor as *conservative* or *optimistic/explorative*, we refer to how these references are constructed. In the idealized setting with exact Bellman policy evaluation, all three value estimators,  $Q$ ,  $\bar{Q}$ , and  $\tilde{Q}$ , would match the true value function  $Q^\pi$  (Sutton & Barto, 2018). However, different actor-critic methods, such as SAC (Haarnoja et al., 2018a) and REDQ (Chen et al., 2021), differ primarily in how they construct  $\bar{Q}$  and  $\tilde{Q}$ .

In Section 4, we review how existing soft actor-critic methods instantiate these components and highlight their limitations. Next, in Section 5, we introduce our proposed DEA approach, which generalizes these constructions through a fully learnable and adaptive ensemble aggregation strategy.

### 4 ENSEMBLE AGGREGATION IN SOFT ACTOR-CRITIC METHODS

Ensembles of  $Q$ -functions have become standard in modern actor-critic algorithms for improving stability and mitigating overestimation bias. Most methods aggregate the outputs of these critics using conservative rules (e.g. by taking the minimum across the ensemble) and pair this with delayed copies as target networks to stabilize updates (Lillicrap et al., 2016; Mnih et al., 2015; Fujimoto et al., 2018). Formally, for each  $i \in [N]$ , let  $Q_i : \mathcal{S} \times \mathcal{A} \rightarrow \mathbb{R}$  be the (active) critic and  $\bar{Q}_i : \mathcal{S} \times \mathcal{A} \rightarrow \mathbb{R}$  its corresponding (delayed) target critic.

The minimum strategy, introduced by Fujimoto et al. (2018) and adopted by SAC (Haarnoja et al., 2018a), aggregates the ensemble by selecting the lowest  $Q$ -value estimate. SAC employs this rule for both the critic target,  $\bar{Q}$ , used in (2), and the actor-update value,  $\tilde{Q}$ , used in (3);

$$\text{SAC:} \quad \bar{Q}(s, a) = \min_{i \in [N]} \bar{Q}_i(s, a) \quad \text{and} \quad \tilde{Q}(s, a) = \min_{i \in [N]} Q_i(s, a).$$

SAC works well for small ensembles (e.g.,  $N = 2$ ), but becomes overly conservative as  $N$  grows, often leading to underestimation and overly cautious policies (Lan et al., 2020; Kuznetsov et al., 2020). Instead, Chen et al. (2021) proposed REDQ, which maintains a larger ensemble of  $N = 10$  critics and applies different aggregation strategies for critic and actor. At each critic update, REDQ

samples a random subset  $S \subset [N]$  of size  $|S| = 2$  and uses the minimum over this subset as the target critic, and for actor policy updates it uses the average over the full  $N$ -ensemble;

$$\text{REDQ:} \quad \bar{Q}(s, a) = \min_{i \in S} \bar{Q}_i(s, a) \quad \text{and} \quad \tilde{Q}(s, a) = \frac{1}{N} \sum_{i=1}^N Q_i(s, a).$$

This decoupled aggregation balances critic conservatism (via a minimum of a random subset) with actor expressiveness (via a full ensemble average), providing improved training stability and greater sample efficiency compared to SAC, particularly in high UTD ratio regimes.

**Limitations.** SAC and REDQ share structural limitations. Both rely on static aggregation rules for  $\bar{Q}$  and  $\tilde{Q}$ , which do not generalize well across learning regimes. SAC’s use of a fixed minimum becomes increasingly conservative with larger ensembles, often leading to persistent underestimation (Nikishin et al., 2022), while REDQ’s actor-side averaging can become unstable when the ensemble is small.

## 5 DIRECTIONAL ENSEMBLE AGGREGATION IN SOFT ACTOR-CRITIC METHODS

Directional Ensemble Aggregation (DEA) introduces a fully learnable framework for ensemble-based value estimation in actor-critic methods. It generalizes static aggregation strategies, such as those used in SAC and REDQ, by learning reference values in a data-driven manner that adapts to uncertainty and training dynamics. The adaptation is controlled by two scalar parameters:  $\bar{\kappa}$ , which controls critic learning stability, and  $\kappa$ , which modulates actor exploration. Both are learned online based on the ensemble’s internal disagreement. Table 1 summarizes how DEA compares to existing methods.

Table 1: Aggregation strategies for constructing the target critic ( $\bar{Q}$ ) and the actor-update critic ( $\tilde{Q}$ ).  $\bar{\delta}$  and  $\delta$  denote ensemble disagreement among  $\{\bar{Q}_i\}$  and  $\{Q_i\}$ , respectively.  $\bar{\kappa}$  and  $\kappa$  are DEA’s learnable parameters that determine how conservative or optimistic  $\bar{Q}$  and  $\tilde{Q}$  should be.

| Method | Target critic $\bar{Q}$                                                | Actor-update critic $\tilde{Q}$                      |
|--------|------------------------------------------------------------------------|------------------------------------------------------|
| SAC    | $\min_{i \in [N]} \bar{Q}_i$                                           | $\min_{i \in [N]} Q_i$                               |
| REDQ   | $\min_{i \in S} \bar{Q}_i$                                             | $\frac{1}{N} \sum_{i=1}^N Q_i$                       |
| DEA    | $\frac{1}{N} \sum_{i=1}^N \bar{Q}_i + \bar{\kappa} \cdot \bar{\delta}$ | $\frac{1}{N} \sum_{i=1}^N Q_i + \kappa \cdot \delta$ |

DEA integrates seamlessly into the soft actor-critic framework (Section 3); its full update cycle is outlined in Algorithm 1, with the design rationale discussed below.

### Algorithm 1 Directional Ensemble Aggregation (DEA)

```

1: Initialize: replay buffer  $\mathcal{D} = \emptyset$ ; critic networks  $Q_{\theta_1}, \dots, Q_{\theta_N}$  and actor network  $\pi_\phi$  with random
   parameters  $\{\theta_i\}_{i=1}^N$  and  $\phi$ ; target critic networks  $\bar{Q}_{\bar{\theta}_1}, \dots, \bar{Q}_{\bar{\theta}_N}$  with  $\bar{\theta}_i \leftarrow \theta_i$  for  $i = 1, \dots, N$ 
2: for each environment interaction do
3:   take action  $a_t \sim \pi_\phi(\cdot|s_t)$ , observe reward  $r_t \triangleq r(s_t, a_t)$ , transition to new state  $s_{t+1} \sim p(\cdot|s_t, a_t)$ , and add  $(s_t, a_t, r_t, s_{t+1})$  to replay buffer  $\mathcal{D}$ 
4:   for each update-to-data ratio do
5:     sample mini-batch  $B = \{(s, a, r, s') : (s, a, r, s') \sim \mathcal{D}, a' \sim \pi_\phi(\cdot|s')\}$ 
6:      $\theta_i \leftarrow \theta_i - \eta_\theta \nabla_{\theta_i} \left\{ \frac{1}{|B|} \sum_B (Q_{\theta_i}(s, a) - y_{\bar{\kappa}}(s, a, r, s'))^2 \right\}, \forall i \in [N]$  ▷ critic
7:      $\bar{\theta}_i \leftarrow \tau \theta_i + (1 - \tau) \bar{\theta}_i, \forall i \in [N]$  ▷ target critic
8:      $\bar{\kappa} \leftarrow \bar{\kappa} - \eta_{\bar{\kappa}} \nabla_{\bar{\kappa}} \left\{ \frac{1}{|B|} \sum_B |\bar{Q}_{\bar{\kappa}}(s, a) - y_{\bar{\kappa}}(s, a, r, s')| / \bar{\delta}(s', a') \right\}$  ▷ DEA: target critic
9:      $\kappa \leftarrow \kappa - \eta_{\kappa} \nabla_{\kappa} \left\{ \frac{1}{|B|} \sum_B |\tilde{Q}_{\kappa}(s, a) - y_{\bar{\kappa}}(s, a, r, s')| / \delta(s, a) \right\}$  ▷ DEA: actor
10:     $\phi \leftarrow \phi + \eta_\phi \nabla_{\phi} \left\{ \frac{1}{|B|} \sum_B (\tilde{Q}_{\kappa}(s, a_\phi(s)) - \alpha \log \pi_\phi(a_\phi(s)|s)) \right\}, a_\phi(s) \sim \pi_\phi(\cdot|s)$  ▷ policy
11:     $\alpha \leftarrow \alpha + \eta_\alpha \nabla_{\alpha} \left\{ \frac{1}{|B|} \sum_B (\log(\alpha) (-\log \pi_\phi(a|s) - \mathcal{H}_{\text{target}})) \right\}$  ▷ entropy

```

**Ensemble disagreement.** To quantify uncertainty within the ensemble, DEA uses a measure of ensemble disagreement defined by the average pairwise deviation of  $Q$ -value estimates. Specifically, for a state-action pair  $(s, a)$ :

$$\delta(\{Q_i(s, a)\}_{i=1}^N) = \frac{1}{\binom{N}{2}} \sum_{i>j} |Q_i(s, a) - Q_j(s, a)|, \quad \text{for } i, j \in [N].$$

This metric is non-parametric, easy to compute, and does not rely on distributional critics (Bellemare et al., 2023). Related notions of ensemble diversity are discussed in more detail in Section 8. For notational clarity, we distinguish disagreement among target critics and active critics:

$$\bar{\delta}(s, a) \triangleq \delta(\{\bar{Q}_i(s, a)\}_{i=1}^N) \quad \text{and} \quad \delta(s, a) \triangleq \delta(\{Q_i(s, a)\}_{i=1}^N).$$

**Soft actor-critic learning with DEA.** DEA is built on the general soft actor-critic framework (Section 3), but can be easily generalized to other algorithmic families. We chose SAC as a use case, as it is the only commonly adopted algorithm with established variants tailored to the learning regimes considered in this work. It replaces fixed aggregation with learnable, uncertainty-aware versions of the target critic  $\bar{Q}$  and the actor-update critic  $\tilde{Q}$ :

$$\text{DEA: } \bar{Q}_{\bar{\kappa}}(s, a) = \frac{1}{N} \sum_{i=1}^N \bar{Q}_i(s, a) + \bar{\kappa} \cdot \bar{\delta}(s, a) \quad \text{and} \quad \tilde{Q}_{\kappa}(s, a) = \frac{1}{N} \sum_{i=1}^N Q_i(s, a) + \kappa \cdot \delta(s, a).$$

Instead of (2), the critic is trained using the modified *target value* using  $\bar{Q}_{\bar{\kappa}}$ :

$$y_{\bar{\kappa}}(s, a, r, s') = r(s, a) + \gamma[\bar{Q}_{\bar{\kappa}}(s', a') - \alpha \log \pi(a'|s')], \quad a' \sim \pi(\cdot|s'). \quad (4)$$

As in previous work (see e.g., Section 3), DEA ensures stability through delayed target critics to prevent rapid shift. Also, all critics share the same ensemble-based target value (4), promoting consistency across the ensemble and avoiding instability caused by divergent critic objectives.

For policy optimization, the actor trained using the modified *actor-update critic*  $\tilde{Q}_{\kappa}$  estimate:

$$\arg \max_{\pi \in \Pi} \mathbb{E}_{a \sim \pi(\cdot|s)} [\tilde{Q}_{\kappa}(s, a) - \alpha \log \pi(a|s)]. \quad (5)$$

**Learning the directional aggregation parameters.** DEA update  $\bar{\kappa}$  and  $\kappa$  through a two-stage learning scheme that aligns critic and actor references while adapting to uncertainty. The critic-side parameter  $\bar{\kappa}$  is optimized to stabilize target values by minimizing the ensemble disagreement-weighted Bellman error:

$$\arg \min_{\bar{\kappa}} \mathbb{E}_{(s, a, r, s') \sim \mathcal{D}, a' \sim \pi(\cdot|s')} [|\tilde{Q}_{\kappa}(s, a) - y_{\bar{\kappa}}(s, a, r, s')| / \bar{\delta}(s', a')]. \quad (6)$$

Subsequently, the actor-side parameter  $\kappa$  is updated to track the learned critic target while being regularized by active-critic disagreement:

$$\arg \min_{\kappa} \mathbb{E}_{(s, a, r, s') \sim \mathcal{D}, a' \sim \pi(\cdot|s')} [|\tilde{Q}_{\kappa}(s, a) - y_{\bar{\kappa}}(s, a, r, s')| / \delta(s, a)]. \quad (7)$$

These objectives use disagreement-weighted absolute errors, producing *sign*-based gradients. Specifically, the gradient of (6) with respect to  $\bar{\kappa}$  is  $-\gamma \mathbb{E}[\text{sign}(\tilde{Q}_{\kappa}(s, a) - y_{\bar{\kappa}}(s, a, r, s'))]$ , and the gradient of (7) with respect to  $\kappa$  is  $\mathbb{E}[\text{sign}(\tilde{Q}_{\kappa}(s, a) - y_{\bar{\kappa}}(s, a, r, s'))]$ .

The key idea is that while error magnitudes are noisy, their *sign* reliably indicates whether estimates overshoot or undershoot targets. By using only this directional signal, DEA avoids domination by high-variance samples and ensures each transition contributes similarly. As a result,  $\bar{\kappa}$  and  $\kappa$  change gradually rather than erratically, improving stability. This reliance on error *direction* but no magnitude motivates the name: *directional* ensemble aggregation.

**Ensemble disagreement and its effect on conservatism and exploration.** Early in training, limited data and unrefined critics lead to high disagreement across the ensemble. As learning progresses and the critics become more aligned, disagreement decreases; especially relative to the growing scale of the  $Q$ -values (e.g., see Figures 10 to 13 in Appendix C). This evolving disagreement regulates the balance between conservatism and exploration in DEA and helps mitigate primacy bias (Nikishin et al., 2022) by reducing the influence of noisy early estimates.

When updating the critic parameters  $\theta$ , disagreement enters through the reference target  $y_{\bar{\kappa}}$ : if  $\bar{\delta}(s', a')$  is large, a positive  $\bar{\kappa}$  inflates  $y_{\bar{\kappa}}$  and risks overestimation, so smaller (often negative) values yield more stable targets. When updating the actor parameters  $\phi$ , disagreement enters via the actor reference  $\tilde{Q}_{\kappa}$ : when  $\delta(s, a)$  is large, large  $\kappa$  would over-emphasize noisy estimates; only as disagreement falls does a large  $\kappa$  become reasonable, supporting more optimistic updates.

When updating the  $\kappa$  parameters themselves, since the entropy term  $-\alpha \log \pi(a'|s')$  is positive,  $y_{\bar{\kappa}}$  often exceeds  $\bar{Q}_{\kappa}$ , making  $\bar{Q}_{\kappa} - y_{\bar{\kappa}}$  negative on average. This drives  $\bar{\kappa}$  downward (more conservative critic targets) while pushing  $\kappa$  upward (more optimistic actor updates). Together, these dynamics ensure DEA transitions from cautious critic guidance under high uncertainty to more exploratory actor updates as training progresses.

The joint evolution of  $\bar{\kappa}$  and  $\kappa$  is analyzed in the next section and illustrated in Figure 1, with additional results across regimes and environments in Figures 6 to 9 in Appendix C.

## 6 EXPERIMENTS

**Learning regimes.** The goal of our experiments is to evaluate DEA across learning settings. These regimes are defined by the UTD ratio, which specifies how many gradient updates are performed per environment interaction. We consider two regimes, interactive and sample-efficient, ranging from low to high update intensity. To align with each setting, we scale the ensemble size proportionally to the UTD ratio; smaller ensembles minimize compute in interactive settings, while larger ensembles promote stability when updates are frequent. Table 2 summarizes the learning regimes. SAC is typically used for the interactive, while REDQ is designed for sample-efficient one. DEA is evaluated in both to assess its ability to generalize.

Table 2: Learning regimes.

| Learning regime  | Ensemble size | Environment interactions | UTD ratio |
|------------------|---------------|--------------------------|-----------|
| Interactive      | 2             | 1,000,000                | 1         |
| Sample-efficient | 10            | 300,000                  | 20        |

**Evaluation metrics.** We evaluate performance using three metrics: Final return measures the average return at the end of training across evaluation repetitions; InterQuartile Mean (IQM) of the final evaluation-time return provides a robust average across seeds by excluding outliers (Agarwal et al., 2021); Area Under the Learning Curve (AULC) captures the cumulative reward over the course of training, reflecting both speed and stability of learning. For each metric and environment, we assign a rank to each method, where a lower rank indicates better performance (i.e., rank 1 is best, rank 2 is second-best, and so on). The average rank is then computed for each metric.

**Experimental setup.** We evaluate DEA on continuous control tasks from the MuJoCo physics simulator (Todorov et al., 2012; Brockman et al., 2016; Towers et al., 2024, version v5) and the DeepMind Control Suite (DMC) (Tassa et al., 2018), under the learning regimes defined in Table 2. These benchmarks were chosen because the limitations of static aggregation and the advantages of adaptive strategies are already well pronounced in such settings, and qualitatively different behavior is not expected in other continuous control domains. Each experiment is repeated across ten seeds. All methods use automatic entropy temperature tuning of  $\alpha$ , following Haarnoja et al. (2018b). Further details on network architecture, training settings, and hyperparameters are provided in Appendix B. Code will be released publicly upon publication to ensure reproducibility.

**Learning trajectories of directional parameters  $\bar{\kappa}$  and  $\kappa$ .** To better understand how DEA modulates aggregation during training, Figure 1 visualizes the trajectories of  $\bar{\kappa}$  and  $\kappa$  under the two learning regimes (Table 2). We initialize the aggregation parameters as  $\bar{\kappa} = -0.8$  and  $\kappa = 0.0$ ; an ablation of initialization sensitivity is provided in Section 7. To ensure stable optimization in an unconstrained parameter space, we apply a tangent transformation to map both parameters into the open interval from minus one to one. The first row of the figure corresponds to the interactive regime, and the second row to the sample-efficient regime. The trends align with the behavior anticipated from our analysis in Section 5. In particular, as training progresses,  $\bar{\kappa}$  typically remains negative, anchoring conservative critic estimates, while  $\kappa$  tends to be positive and further increases when learning proceeds, to support explorative actor behavior. This dynamic interplay reflects DEA’s ability to adaptively balance exploration and conservatism based on the ensemble disagreement and training context. Trajectories across all tasks, seeds, and learning regimes can be found in Appendix C.

**Generalization across learning regimes.** Average performance across both learning regimes is summarized in Table 3; detailed results for each individual regime are provided in Appendix C. Overall, DEA outperforms the best-performing baseline across tasks and metrics. Notably, it achieves

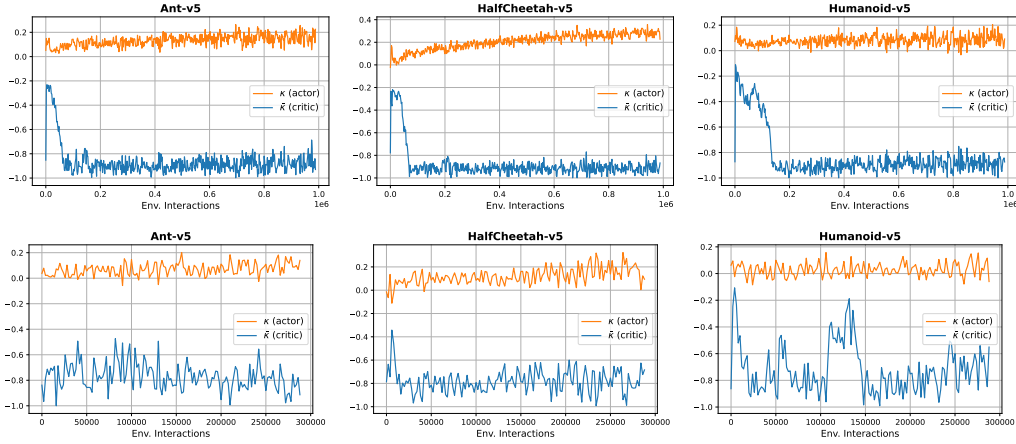

Figure 1: Trajectories of the directional aggregation parameters  $\bar{\kappa}$  (critic) and  $\kappa$  (actor) on MuJoCo. The top row shows results for the interactive regime, and the bottom row for the sample-efficient regime (Table 2). Trajectories of all tasks, seeds, and learning regimes can be found in Appendix C.

Table 3: Performance on MuJoCo and DMC environments. Metrics are average final return, InterQuantile Mean (IQM) of the final return, and Area Under the Learning Curve (AULC), averaged over learning regimes, evaluation repetitions, and ten seeds. Average rank is computed per metric across environments.  $\uparrow$ : higher is better,  $\downarrow$ : lower is better. Best algorithm per metric is **bold**.

| Environment                |                                   | Final Return ( $\uparrow$ ) |             |      | IQM ( $\uparrow$ ) |             |      | AULC ( $\uparrow$ ) |            |      |
|----------------------------|-----------------------------------|-----------------------------|-------------|------|--------------------|-------------|------|---------------------|------------|------|
|                            |                                   | DEA                         | REDQ        | SAC  | DEA                | REDQ        | SAC  | DEA                 | REDQ       | SAC  |
| MuJoCo                     | Ant-v5                            | <b>4920</b>                 | 4278        | 2199 | <b>5226</b>        | 4712        | 2583 | <b>2829</b>         | 2249       | 1556 |
|                            | HalfCheetah-v5                    | <b>10158</b>                | 10065       | 8267 | <b>10334</b>       | 10039       | 8250 | <b>7745</b>         | 7682       | 6600 |
|                            | Hopper-v5                         | <b>3376</b>                 | 2756        | 2526 | <b>3543</b>        | 2835        | 2760 | <b>2780</b>         | 2432       | 1891 |
|                            | Humanoid-v5                       | <b>5073</b>                 | 4682        | 4832 | 5331               | <b>5338</b> | 5311 | <b>3315</b>         | 2864       | 2857 |
|                            | Walker2d-v5                       | 4425                        | <b>4440</b> | 2989 | <b>4663</b>        | 4564        | 2716 | <b>3111</b>         | 3037       | 1963 |
|                            | MuJoCo Avg. Rank ( $\downarrow$ ) | <b>1.2</b>                  | 2.0         | 2.8  | <b>1.2</b>         | 1.8         | 3.0  | <b>1.0</b>          | 2.0        | 3.0  |
| DMC                        | Cheetah-run                       | 813                         | <b>833</b>  | 690  | 812                | <b>855</b>  | 707  | 619                 | <b>650</b> | 525  |
|                            | Hopper-hop                        | <b>175</b>                  | 174         | 58   | <b>157</b>         | 148         | 40   | <b>112</b>          | 105        | 32   |
|                            | Hopper-stand                      | <b>785</b>                  | 620         | 379  | <b>930</b>         | 525         | 448  | <b>579</b>          | 490        | 216  |
|                            | Humanoid-run                      | <b>152</b>                  | 149         | 80   | 154                | <b>155</b>  | 80   | <b>92</b>           | 83         | 39   |
|                            | Humanoid-stand                    | <b>658</b>                  | 634         | 348  | <b>676</b>         | 654         | 313  | <b>344</b>          | 327        | 170  |
|                            | Humanoid-walk                     | <b>498</b>                  | 487         | 283  | <b>507</b>         | 506         | 283  | <b>282</b>          | 267        | 149  |
|                            | Quadruped-run                     | <b>823</b>                  | 803         | 531  | 844                | <b>869</b>  | 454  | <b>621</b>          | 597        | 413  |
|                            | Quadruped-walk                    | <b>925</b>                  | 917         | 566  | <b>946</b>         | 939         | 527  | <b>754</b>          | 701        | 472  |
|                            | Walker-run                        | <b>731</b>                  | 705         | 503  | <b>753</b>         | 715         | 499  | <b>597</b>          | 568        | 395  |
|                            | DMC Avg. Rank ( $\downarrow$ )    | <b>1.11</b>                 | 1.89        | 3.00 | <b>1.33</b>        | 1.67        | 3.00 | <b>1.11</b>         | 1.89       | 3.00 |
| Avg. Rank ( $\downarrow$ ) |                                   | <b>1.14</b>                 | 1.93        | 2.93 | <b>1.29</b>        | 1.71        | 3.00 | <b>1.07</b>         | 1.93       | 3.00 |

the highest average rank in all three metrics: final return, IQM, and AULC, with a particularly strong lead in AULC, indicating more reliable and efficient learning over time. Unlike existing methods, which are typically optimized for a fixed learning regime, DEA adapts its aggregation strategy during training, based on ensemble disagreement and training context, enabling it to generalize across learning regimes.

In particular, SAC is designed for low-UTD settings with small ensembles and often becomes overly conservative under higher UTD ratios. REDQ, by contrast, performs well in sample-efficient settings where its high UTD ratio and large ensemble size support rapid learning. Yet, REDQ tends to be unstable or less effective in low-update regimes, where its fixed update strategy becomes less reliable. DEA avoids these limitations by dynamically adjusting its behavior to the demands of the training context, rather than relying on static aggregation rules.

Learning curves and trajectories of the directional aggregation parameters ( $\bar{\kappa}$  and  $\kappa$ ) across all tasks and learning regimes are provided in Appendix C.

## 7 ABLATIONS

Our experiments already spans two distinct learning regimes (interactive and sample-efficient) which naturally serve as ablations over ensemble size and UTD ratio. As shown in Section 6, DEA remains effective across these varying configurations.

**Fixed aggregation and degenerate cases.** A natural ablation is to fix  $\bar{\kappa}$  and  $\kappa$  to constants. Doing so effectively recovers existing baselines: for example, setting both to enforce a static minimum corresponds to the conservative update used in SAC, while using a fixed mean aligns with REDQ. These variants remove DEA’s adaptivity and result in behavior already covered by prior methods. Fixing either  $\bar{\kappa}$  or  $\kappa$  individually also degrades performance. As described in Section 5, these parameters act as directional anchors:  $\bar{\kappa}$  controls critic-side conservatism, while  $\kappa$  guides actor-side aggregation. Learning both jointly is crucial to allow DEA to interpolate between exploration and caution based on ensemble disagreement. Without this flexibility, the critic and actor can become misaligned, undermining the value of directional ensemble learning. In such cases, DEA loses its ability to adapt to uncertainty and learning dynamics, and its performance suffers accordingly.

**Sensitivity to initializations.** We study the sensitivity of DEA to different initializations of the critic-side aggregation parameter  $\bar{\kappa}$ , while keeping the actor-side initialization of  $\kappa$  fixed at zero. This isolates the effect of  $\bar{\kappa}$  and avoids interactions between the two directional parameters. Initializing  $\kappa$  at zero provides a neutral initialization that does not bias the actor toward conservatism or optimism at the start of training. Results are shown in Figures 14 and 15 (Appendix D) for the five MuJoCo environments. As expected, the impact of initialization varies across tasks and learning regimes. While these results highlight the importance of choosing a good initialization, especially in higher UTD settings, DEA remains stable across all tested configurations, thanks to its robustness to the unforeseen effects of numerical perturbations. This robustness stems from its directional update rule, which only preserves the essential sign-information. None of the initializations lead to divergence or collapse, and many configurations outperform both SAC and REDQ.

## 8 RELATED WORK

Ensemble methods in off-policy RL have been widely studied for their ability to stabilize training, estimate uncertainty, and facilitate exploration. Below, we review prior work through three lenses most relevant to our work: (i) reducing overestimation bias, (ii) enabling efficient exploration, and (iii) improving sample efficiency across varying UTD regimes. These objectives often overlap, and many methods address multiple goals simultaneously. Below, we highlight representative approaches within each category. A more detailed discussion is provided in Appendix A.

**Reducing overestimation bias with ensembles.** Overestimation bias in  $Q$ -value estimates can destabilize training and degrade policy performance. To address this issue, various methods have been proposed for both discrete and continuous control. In discrete-action settings, overestimation is mitigated by aggregating multiple  $Q$ -value estimates in various different manners (Van Hasselt, 2010; Van Hasselt et al., 2016; Anschel et al., 2017; Lan et al., 2020). However, these techniques do not extend naturally to continuous control. In continuous settings, TD3 (Fujimoto et al., 2018) proposed taking the minimum over two  $Q$ -networks to reduce bias, a strategy adopted and extended by SAC (Haarnoja et al., 2018a) and others (Chen et al., 2021; Ciosek et al., 2019). These methods stabilize training by conservatively anchoring the target through fixed ensemble aggregation rules. DEA, on the other hand, avoids such hard-coded ensemble rules and allows adjusting ensembles dynamics based on training dynamics.

Recently, regularized value estimation methods have sought to adaptively reduce bias. GPL (Cetin & Celikutan, 2023), for example, uses a distributional critic and dual TD-learning with regularization. However, GPL does not straightforwardly generalize outside its narrow learning regime, struggling in interactive (low-UTD) settings and requiring large ensembles and high UTD ratios for stability (Cetin

& Celiktutan, 2023, Figures 13 and 15). Its sample efficiency depends on pre-tuned, task-specific hyperparameters, particularly heuristic entropy targets, and a fixed optimism schedule (Cetin & Celiktutan, 2023, Tables 2 and 3). In contrast, DEA avoids such rigidity by using scalar  $Q$ -values and learning aggregation weights directly from data, adapting flexibly across learning regimes without distributional modeling or handcrafted schedules.

**Efficient exploration.** While conservative value estimates provide stability, they can suppress exploration and slow learning. Prior approaches for discrete control encourage exploration by leveraging ensemble disagreement (Osband et al., 2016; Chen et al., 2017). In continuous control, OAC (Ciosek et al., 2019) leverages upper confidence bounds to guide exploration, while TOP (Moskovitz et al., 2021) frames the trade-off between conservatism and exploration as a multi-armed bandit problem, switching between predefined aggregation strategies. DAC (Nauman & Cygan, 2025) takes a different approach by maintaining two actors; a pessimistic one for conservative updates and an optimistic one for exploration. DEA differs from these methods by guiding a single actor through a fully learnable aggregation scheme. Rather than relying on handcrafted decision rules, confidence bounds, or architectural complexity, DEA integrates ensemble disagreement directly into the actor update and adjusts exploration adaptively during training.

**Sample efficiency.** Improving sample efficiency is a central goal in off-policy RL. REDQ (Chen et al., 2021) addresses this by using large ensembles and high UTD ratios. However, REDQ relies on a fixed aggregation strategy and does not adapt to evolving uncertainty or training dynamics. AQE (Wu et al., 2022) and TQC (Kuznetsov et al., 2020) enhance learning by either averaging over subsets of multi-head critics (AQE) or truncating the highest  $Q$ -value estimates (TQC). However, both approaches require manually chosen thresholds or hyperparameters that must be tuned separately for each task or training regime. In contrast, DEA dynamically adapts its aggregation behavior based on ensemble disagreement, automatically adjusting conservatism and exploration without relying on fixed schedules or per-task tuning.

Other methods like SUNRISE (Lee et al., 2021) and MeanQ (Liang et al., 2022) also promote sample-efficient learning but are tailored to fixed schedules and architectures. DEA instead modulates ensemble aggregation dynamically, allowing a single actor-critic algorithm to perform robustly across both interactive (low-UTD) and sample-efficient (high-UTD) regimes without manual tuning.

DEA aims to learn a general-purpose aggregation mechanism that operates effectively across learning regimes, from interactive (low-UTD) to sample-efficient (high-UTD) settings, by leveraging ensemble disagreement in a principled, learnable manner. In this landscape, SAC (Haarnoja et al., 2018a) and REDQ (Chen et al., 2021) represent the most adopted baselines for each learning regime.

## 9 DISCUSSION

DEA is an adaptive ensemble-based method for actor-critics that works across learning regimes. Its key strength is adaptability: DEA learns directional aggregation weights that evolve with the data, allowing it to adjust autonomously to varying tasks, uncertainty levels, and training dynamics. This flexibility allows DEA to perform reliably across both interactive and sample-efficient settings, something that prior methods typically address only in isolation.

**Limitations.** Despite strong empirical performance, DEA has limitations. Learnable aggregation parameters increase training complexity. Although DEA was stable across tasks and seeds in our experiments, its effectiveness may decline with very small ensembles that provide weak disagreement signals. Our study focused on dense-reward environments where random exploration often suffices and estimation bias can be partly offset by heuristics. The fact that DEA still yields clear gains highlights its strength, and we expect these benefits to be even greater in sparse-reward settings where exploration is harder. While results indicate that directional aggregation mitigates overestimation bias and improves learning, this remains unsupported by theory.

**Future work.** Our work focuses exclusively on online RL; extending these ideas to the offline setting is an exciting direction, especially building on the promising findings demonstrated in the online setting. Additionally, pairing DEA with more advanced frameworks, such as BRO (Nauman et al., 2024b) or Simba (Lee et al., 2025), could further improve learning.

## REFERENCES

- Zaheer Abbas, Rosie Zhao, Joseph Modayil, Adam White, and Marlos C Machado. Loss of plasticity in continual deep reinforcement learning. In *Conference on Lifelong Learning Agents (CoLLAs)*, 2023.
- Rishabh Agarwal, Max Schwarzer, Pablo Samuel Castro, Aaron C Courville, and Marc Bellemare. Deep reinforcement learning at the edge of the statistical precipice. *Advances in Neural Information Processing Systems (NeurIPS)*, 2021.
- Gaon An, Seungyong Moon, Jang-Hyun Kim, and Hyun Oh Song. Uncertainty-based offline reinforcement learning with diversified q-ensemble. *Advances in Neural Information Processing Systems (NeurIPS)*, 2021.
- Oron Anschel, Nir Baram, and Nahum Shimkin. Averaged-dqn: Variance reduction and stabilization for deep reinforcement learning. In *Proceedings of the International Conference on Machine Learning (ICML)*, 2017.
- Marc G Bellemare, Will Dabney, and Mark Rowland. *Distributional reinforcement learning*. MIT Press, 2023.
- Dimitri Bertsekas and John N Tsitsiklis. *Neuro-dynamic programming*. Athena Scientific, 1996.
- G. Brockman, V. Cheung, L. Pettersson, J. Schneider, J. Schulman, J. Tang, and W. Zaremba. OpenAI Gym. *arXiv preprint arXiv:1606.01540*, 2016.
- Edoardo Ceting and Oya Celiktutan. Learning pessimism for reinforcement learning. In *Proceedings of the AAAI Conference on Artificial Intelligence*, 2023.
- Richard Y Chen, Szymon Sidor, Pieter Abbeel, and John Schulman. Ucb exploration via q-ensembles. *arXiv preprint arXiv:1706.01502*, 2017.
- Xinyue Chen, Che Wang, Zijian Zhou, and Keith W Ross. Randomized ensembled double q-learning: Learning fast without a model. In *International Conference on Learning Representations (ICLR)*, 2021.
- Kamil Ciosek, Quan Vuong, Robert Loftin, and Katja Hofmann. Better exploration with optimistic actor critic. *Advances in Neural Information Processing Systems (NeurIPS)*, 2019.
- Scott Fujimoto, Herke Hoof, and David Meger. Addressing function approximation error in actor-critic methods. In *Proceedings of the International Conference on Machine Learning (ICML)*, 2018.
- Tuomas Haarnoja, Haoran Tang, Pieter Abbeel, and Sergey Levine. Reinforcement learning with deep energy-based policies. In *Proceedings of the International Conference on Machine Learning (ICML)*, 2017.
- Tuomas Haarnoja, Aurick Zhou, Pieter Abbeel, and Sergey Levine. Soft actor-critic: Off-policy maximum entropy deep reinforcement learning with a stochastic actor. In *Proceedings of the International Conference on Machine Learning (ICML)*, 2018a.
- Tuomas Haarnoja, Aurick Zhou, Kristian Hartikainen, George Tucker, Sehoon Ha, Jie Tan, Vikash Kumar, Henry Zhu, Abhishek Gupta, Pieter Abbeel, et al. Soft actor-critic algorithms and applications. *arXiv preprint arXiv:1812.05905*, 2018b.
- D.P. Kingma and J. Ba. Adam: A method for stochastic optimization. In *International Conference on Learning Representations (ICLR)*, 2015.
- Arsenii Kuznetsov, Pavel Shvechikov, Alexander Grishin, and Dmitry Vetrov. Controlling overestimation bias with truncated mixture of continuous distributional quantile critics. In *Proceedings of the International Conference on Machine Learning (ICML)*, 2020.
- Qingfeng Lan, Yangchen Pan, Alona Fyshe, and Martha White. Maxmin q-learning: Controlling the estimation bias of q-learning. In *International Conference on Learning Representations (ICLR)*, 2020.

- Hojoon Lee, Dongyoon Hwang, Donghu Kim, Hyunseung Kim, Jun Jet Tai, Kaushik Subramanian, Peter R Wurman, Jaegul Choo, Peter Stone, and Takuma Seno. Simba: Simplicity bias for scaling up parameters in deep reinforcement learning. In *International Conference on Learning Representations (ICLR)*, 2025.
- Kimin Lee, Michael Laskin, Aravind Srinivas, and Pieter Abbeel. Sunrise: A simple unified framework for ensemble learning in deep reinforcement learning. In *Proceedings of the International Conference on Machine Learning (ICML)*, 2021.
- Litian Liang, Yaosheng Xu, Stephen McAleer, Dailin Hu, Alexander Ihler, Pieter Abbeel, and Roy Fox. Reducing variance in temporal-difference value estimation via ensemble of deep networks. In *Proceedings of the International Conference on Machine Learning (ICML)*, 2022.
- T.P. Lillicrap, J.J. Hunt, A. Pritzel, N. Heess, T. Erez, Y. Tassa, D. Silver, and D. Wierstra. Continuous control with deep reinforcement learning. In *International Conference on Learning Representations (ICLR)*, 2016.
- Volodymyr Mnih, Koray Kavukcuoglu, David Silver, Alex Graves, Ioannis Antonoglou, Daan Wierstra, and Martin Riedmiller. Playing atari with deep reinforcement learning. *arXiv preprint arXiv:1312.5602*, 2013.
- Volodymyr Mnih, Koray Kavukcuoglu, David Silver, Andrei A Rusu, Joel Veness, Marc G Bellemare, Alex Graves, Martin Riedmiller, Andreas K Fidjeland, Georg Ostrovski, et al. Human-level control through deep reinforcement learning. *Nature*, 2015.
- Ted Moskowitz, Jack Parker-Holder, Aldo Pacchiano, Michael Arbel, and Michael Jordan. Tactical optimism and pessimism for deep reinforcement learning. *Advances in Neural Information Processing Systems (NeurIPS)*, 2021.
- Michał Nauman and Marek Cygan. Decoupled policy actor-critic: Bridging pessimism and risk awareness in reinforcement learning. In *Proceedings of the AAAI Conference on Artificial Intelligence*, 2025.
- Michał Nauman, Michał Bortkiewicz, Piotr Miłoś, Tomasz Trzcinski, Mateusz Ostaszewski, and Marek Cygan. Overestimation, overfitting, and plasticity in actor-critic: the bitter lesson of reinforcement learning. In *Proceedings of the International Conference on Machine Learning (ICML)*, 2024a.
- Michał Nauman, Mateusz Ostaszewski, Krzysztof Jankowski, Piotr Miłoś, and Marek Cygan. Bigger, regularized, optimistic: scaling for compute and sample efficient continuous control. *Advances in Neural Information Processing Systems (NeurIPS)*, 2024b.
- Evgenii Nikishin, Max Schwarzer, Pierluca D’Oro, Pierre-Luc Bacon, and Aaron Courville. The primacy bias in deep reinforcement learning. In *Proceedings of the International Conference on Machine Learning (ICML)*, 2022.
- Ian Osband, Charles Blundell, Alexander Pritzel, and Benjamin Van Roy. Deep exploration via bootstrapped dqn. *Advances in Neural Information Processing Systems (NeurIPS)*, 2016.
- A. Paszke, S. Gross, F. Massa, A. Lerer, J. Bradbury, G. Chanan, T. Devor Killeen, Z. Lin, N. Gimeshein, L. Antiga, A. Desmaison, A. Kopf, E. Yang, Z. DeVito, M. Raison, A. Tejani, S. Chilamkurthy, B. Steiner, L. Fang, J. Bai, and S. Chintala. PyTorch: An Imperative Style, High-Performance Deep Learning Library. *Advances in Neural Information Processing Systems (NeurIPS)*, 2019.
- Martin L Puterman. *Markov decision processes: discrete stochastic dynamic programming*. John Wiley & Sons, 2014.
- Wenling Shang, Kihyuk Sohn, Diogo Almeida, and Honglak Lee. Understanding and improving convolutional neural networks via concatenated rectified linear units. In *Proceedings of the International Conference on Machine Learning (ICML)*, 2016.
- Hassam Sheikh, Mariano Phielipp, and Ladislau Boloni. Maximizing ensemble diversity in deep reinforcement learning. In *International Conference on Learning Representations (ICLR)*, 2022.

- David Silver, Guy Lever, Nicolas Heess, Thomas Degris, Daan Wierstra, and Martin Riedmiller. Deterministic policy gradient algorithms. In *Proceedings of the International Conference on Machine Learning (ICML)*, 2014.
- Richard S Sutton and Andrew G Barto. *Reinforcement learning: An introduction*. MIT Press, 2018.
- Y. Tassa, Y. Doron, A. Muldal, T. Erez, Y. Li, D. de Las Casas, D. Budden, A. Abdolmaleki, J. Merel, A. Lefrancq, et al. Deepmind control suite. *arXiv preprint arXiv:1801.00690*, 2018.
- Sebastian Thrun and Anton Schwartz. Issues in using function approximation for reinforcement learning. In *Proceedings of the Fourth Connectionist Models Summer School*, 1993.
- Emanuel Todorov, Tom Erez, and Yuval Tassa. Mujoco: A physics engine for model-based control. In *IEEE/RSJ International Conference on Intelligent Robots and Systems (IROS)*, 2012.
- Mark Towers, Ariel Kwiatkowski, Jordan Terry, John U Balis, Gianluca De Cola, Tristan Deleu, Manuel Goulao, Andreas Kallinteris, Markus Krimmel, Arjun KG, et al. Gymnasium: A standard interface for reinforcement learning environments. *arXiv preprint arXiv:2407.17032*, 2024.
- Hado Van Hasselt. Double q-learning. *Advances in Neural Information Processing Systems (NeurIPS)*, 2010.
- Hado Van Hasselt, Arthur Guez, and David Silver. Deep reinforcement learning with double q-learning. In *Proceedings of the AAAI Conference on Artificial Intelligence*, 2016.
- Christopher JCH Watkins and Peter Dayan. Q-learning. *Machine Learning*, 1992.
- Yanqiu Wu, Xinyue Chen, Che Wang, Yiming Zhang, and Keith W Ross. Aggressive q-learning with ensembles: Achieving both high sample efficiency and high asymptotic performance. *Advances in Neural Information Processing Systems (NeurIPS)*, 2022. Deep Reinforcement Learning Workshop.
- Brian D Ziebart. *Modeling purposeful adaptive behavior with the principle of maximum causal entropy*. Carnegie Mellon University, 2010.

## APPENDICES

### A EXTENDED DISCUSSION OF RELATED WORK

**Reducing overestimation bias with ensembles.** Overestimation bias in  $Q$ -value estimates can destabilize training and degrade policy performance. To address this issue, various methods have been proposed for both discrete and continuous control. In discrete-action settings, overestimation is mitigated by conservatively aggregating multiple  $Q$ -value estimates, as in Double  $Q$ -learning (Van Hasselt, 2010; Van Hasselt et al., 2016), Averaged DQN (Anschel et al., 2017), and Maxmin  $Q$ -learning (Lan et al., 2020). However, these techniques do not extend naturally to continuous control.

In continuous settings, TD3 (Fujimoto et al., 2018) proposed taking the minimum over two  $Q$ -networks to reduce bias, a strategy adopted and extended by SAC (Haarnoja et al., 2018a) and others (Chen et al., 2021; Ciosek et al., 2019). These methods stabilize training by conservatively anchoring the target through fixed ensemble aggregation rules. DEA generalizes these approaches by introducing learnable, directional aggregation parameters for the critic and the actor, enabling adaptive control over conservatism and exploration in response to ensemble disagreement.

Recently, regularized value estimation methods have also sought to address bias adaptively. GPL (Cetin & Celiktutan, 2023), for example, introduces a regularization mechanism based on a distributional critic and dual TD-learning. While it can be effective in specific settings, GPL performs poorly outside its narrow operating regime, struggling in interactive learning scenarios and relying heavily on large ensembles and high UTD ratios for stability and performance (Cetin & Celiktutan, 2023, Figures 13 and 15). Moreover, its apparent sample efficiency depends on extensive pre-tuning; it requires task-specific hyperparameters, particularly heuristic entropy targets that are carefully selected for each environment (Cetin & Celiktutan, 2023, Tables 2). Another limitation of GPL is its reliance on a deterministic optimism schedule that forces the actor to behave optimistically early in training and gradually shift toward conservatism (Cetin & Celiktutan, 2023, Tables 3). In contrast, DEA avoids such rigidity. DEA uses standard scalar  $Q$ -values and learns both actor- and critic-side aggregation weights directly from data, adapting flexibly across learning regimes without relying on distributional modeling, fixed optimism schedules, or heuristic entropy targets.

**Efficient exploration.** While conservative value estimates provide stability, they can suppress exploration and slow learning. To encourage exploration, several ensemble-based strategies have been developed. In discrete-action settings, Bootstrapped DQN (Osband et al., 2016) and its UCB-based extension (Chen et al., 2017) use ensemble disagreement to approximate posterior uncertainty and enable Thompson sampling.

In continuous control, OAC (Ciosek et al., 2019) leverages upper confidence bounds to guide exploration, while TOP (Moskovitz et al., 2021) frames the trade-off between conservatism and exploration as a multi-armed bandit problem, switching between predefined aggregation strategies. DAC (Nauman & Cygan, 2025) takes a different approach by maintaining two actors; a pessimistic one for conservative updates and an optimistic one for exploration. DEA differs from these methods by guiding a single actor through a fully learnable aggregation scheme. Rather than relying on handcrafted decision rules, confidence bounds, or architectural complexity, DEA integrates ensemble disagreement directly into the actor update and adjusts exploration adaptively during training.

**Sample efficiency.** Improving sample efficiency is a central goal in off-policy RL. REDQ (Chen et al., 2021) addresses this by using large ensembles and high UTD ratios. However, REDQ relies on a fixed aggregation strategy and does not adapt to evolving uncertainty or training dynamics. AQE (Wu et al., 2022) and TQC (Kuznetsov et al., 2020) enhance learning by either averaging over subsets of multi-head critics (AQE) or truncating the highest  $Q$ -value estimates (TQC). However, both approaches require manually chosen thresholds or hyperparameters that must be tuned separately for each task or training regime. In contrast, DEA dynamically adapts its aggregation behavior based on ensemble disagreement, automatically adjusting conservatism and exploration without relying on fixed schedules or per-task tuning.

Other methods, such as SUNRISE (Lee et al., 2021) and MeanQ (Liang et al., 2022), also target sample-efficient learning but are tailored to fixed regimes and require specific aggregation strategies. While some  $Q$ -learning-based methods like Maxmin  $Q$ -learning (Lan et al., 2020) and Average

DQN (Anschel et al., 2017) offer insights into efficient learning, they focus on discrete control and are less applicable to continuous domains. In contrast, DEA modulates ensemble aggregation dynamically, allowing a single actor-critic algorithm to perform robustly across both interactive (low-UTD) and sample-efficient (high-UTD) regimes without manual tuning.

**Ensemble disagreement and diversity.** Additional ensemble-based methods leverage disagreement or diversity as a regularization signal. MED-RL (Sheikh et al., 2022) uses diversified ensemble for RL. However, it is different from DEA in at least two ways: (i) the diversity is measured on the representation of the networks, not the  $Q$ -value itself, and (ii) the diversity is used as a regularizer that can be incorporated into existing algorithms. In contrast, DEA focuses on value-level disagreement and learns to modulate aggregation weights directly, with no algorithm-specific dependencies or architectural overhead.

In offline RL, where overestimation and distributional shift are particularly pronounced, ensembles are used to induce conservative value estimates. EDAC (An et al., 2021), for instance, leverage ensembles to detect out-of-distribution actions and penalize them. These methods assume a fixed dataset and often require very large ensembles (e.g., 50+ critics). Moreover, their use of ensemble disagreement is limited to regularizing critic training, while both the target  $Q$ -value and actor updates still rely on the minimum of the ensemble. DEA shares the conservatism goal but is designed for online RL and avoids such structural burdens by learning adaptive aggregation parameters that regulate the influence of ensemble disagreement over time.

## B EXPERIMENTAL SETUP, HYPERPARAMETERS, AND IMPLEMENTATION DETAILS

Our experiments are implemented in PyTorch (Paszke et al., 2019, Version 2.1.0). We conduct experiments on continuous control tasks using the v5-versions of the MuJoCo physics engine (Todorov et al., 2012; Brockman et al., 2016; Towers et al., 2024), and the DeepMind Control Suite (DMC) (Tassa et al., 2018).

The specific ensemble sizes, number of environment interactions, and UTD ratios used in each learning regime are shared across all methods and task; see details in Table 2.

The hyperparameters used in our experiments are summarized in Table 4. These configurations follow the original implementations of SAC (Haarnoja et al., 2018a) and REDQ (Chen et al., 2021). Following the recommendations of Nauman et al. (2024a), we use Concatenated ReLU (CReLU) activations to prevent the loss of plasticity in deep RL networks (Abbas et al., 2023; Shang et al., 2016).

As outlined in Section 2, all soft actor-critic methods learn the entropy temperature  $\alpha$  dynamically using the method proposed in Haarnoja et al. (2018b), which tunes  $\alpha$  to match a target entropy based on the action dimensionality; see Table 4 for specific values.

Across all learning regimes (Table 2), we use the same network architecture, batch sizes, and learning rates to ensure comparability. The overall compute cost is similar across SAC, REDQ, and DEA when the number of critics and UTD ratios are matched.

The DEA method introduces only a negligible computational overhead due to the additional scalars  $\kappa$  and  $\bar{\kappa}$  and their gradients. All experiments were run on NVIDIA GeForce RTX 4090 GPUs. Four

Table 4: Model architectures and hyperparameters shared across DEA, REDQ, and SAC.

| Hyperparameter                                   | DEA | REDQ                     | SAC |
|--------------------------------------------------|-----|--------------------------|-----|
| <i>Network architecture (actor and critics)</i>  |     |                          |     |
| Hidden layers                                    |     | 2                        |     |
| Layer size                                       |     | 256                      |     |
| Activation function                              |     | CReLU                    |     |
| <i>Optimization</i>                              |     |                          |     |
| Batch size                                       |     | 256                      |     |
| Optimizer                                        |     | Adam (Kingma & Ba, 2015) |     |
| Learning rate                                    |     | $3 \cdot 10^{-4}$        |     |
| <i>General training configuration</i>            |     |                          |     |
| Replay buffer size                               |     | $1 \cdot 10^6$           |     |
| Random initial steps                             |     | 10,000                   |     |
| Discount factor ( $\gamma$ )                     |     | 0.99                     |     |
| Target smoothing ( $\tau$ )                      |     | $5 \cdot 10^{-3}$        |     |
| Initial entropy ( $\alpha$ )                     |     | 0.2                      |     |
| Target entropy ( $\mathcal{H}_{\text{target}}$ ) |     | $-\dim(\mathcal{A})/2$   |     |
| Seeds                                            |     | $\{1, 2, \dots, 10\}$    |     |

Table 5: Performance on MuJoCo envs. for each learning regime (Table 2). Metrics are average final return, InterQuantile Mean (IQM) of the final return, and Area Under the Learning Curve (AULC), averaged over evaluation repetitions and ten seeds.  $\pm$  denotes standard deviation over seeds.

| <b>Interactive learning</b> (1M env. interactions, 2 critics, 1 update-to-data ratio) |                 |                 |                 |                |                |                 |      |      |      |
|---------------------------------------------------------------------------------------|-----------------|-----------------|-----------------|----------------|----------------|-----------------|------|------|------|
| Environment                                                                           | Final Return    |                 |                 | IQM            |                |                 | AULC |      |      |
|                                                                                       | DEA             | REDQ            | SAC             | DEA            | REDQ           | SAC             | DEA  | REDQ | SAC  |
| Ant-v5                                                                                | 5355 $\pm$ 1126 | 4083 $\pm$ 1477 | 4396 $\pm$ 1911 | 5708 $\pm$ 200 | 4595 $\pm$ 451 | 5164 $\pm$ 502  | 3292 | 2168 | 3052 |
| HalfCheetah-v5                                                                        | 10595 $\pm$ 947 | 11437 $\pm$ 264 | 10947 $\pm$ 630 | 11007 $\pm$ 70 | 11400 $\pm$ 80 | 11074 $\pm$ 138 | 8423 | 8791 | 8533 |
| Hopper-v5                                                                             | 3425 $\pm$ 379  | 2344 $\pm$ 842  | 3060 $\pm$ 885  | 3531 $\pm$ 22  | 2254 $\pm$ 538 | 3458 $\pm$ 80   | 2901 | 2097 | 2482 |
| Humanoid-v5                                                                           | 4780 $\pm$ 1295 | 4646 $\pm$ 1420 | 4761 $\pm$ 1225 | 5286 $\pm$ 35  | 5271 $\pm$ 360 | 5281 $\pm$ 102  | 3689 | 2734 | 3346 |
| Walker2d-v5                                                                           | 4270 $\pm$ 1350 | 4182 $\pm$ 1352 | 4396 $\pm$ 245  | 4674 $\pm$ 155 | 4378 $\pm$ 246 | 4396 $\pm$ 108  | 3273 | 2749 | 2962 |

  

| <b>Sample-efficient learning</b> (300K env. interactions, 10 critics, 20 update-to-data ratio) |                 |                 |                 |                |                |                 |      |      |      |
|------------------------------------------------------------------------------------------------|-----------------|-----------------|-----------------|----------------|----------------|-----------------|------|------|------|
| Environment                                                                                    | Final Return    |                 |                 | IQM            |                |                 | AULC |      |      |
|                                                                                                | DEA             | REDQ            | SAC             | DEA            | REDQ           | SAC             | DEA  | REDQ | SAC  |
| Ant-v5                                                                                         | 4485 $\pm$ 1044 | 4473 $\pm$ 1142 | 1 $\pm$ 4       | 4744 $\pm$ 260 | 4828 $\pm$ 398 | 1 $\pm$ 1       | 2367 | 2329 | 61   |
| HalfCheetah-v5                                                                                 | 9721 $\pm$ 817  | 8692 $\pm$ 1380 | 5586 $\pm$ 662  | 9661 $\pm$ 395 | 8678 $\pm$ 813 | 5425 $\pm$ 191  | 7066 | 6573 | 4666 |
| Hopper-v5                                                                                      | 3326 $\pm$ 583  | 3169 $\pm$ 592  | 1992 $\pm$ 1278 | 3555 $\pm$ 32  | 3415 $\pm$ 153 | 2063 $\pm$ 1034 | 2659 | 2766 | 1300 |
| Humanoid-v5                                                                                    | 5365 $\pm$ 446  | 4718 $\pm$ 1544 | 4903 $\pm$ 1376 | 5376 $\pm$ 87  | 5404 $\pm$ 61  | 5341 $\pm$ 124  | 2941 | 2994 | 2368 |
| Walker2d-v5                                                                                    | 4579 $\pm$ 815  | 4697 $\pm$ 599  | 1581 $\pm$ 1384 | 4652 $\pm$ 267 | 4749 $\pm$ 170 | 1035 $\pm$ 830  | 2949 | 3325 | 964  |

seeds were run in parallel, resulting in a wall-clock time of approximately 3–8 hours to complete all four seeds, depending on the environment and learning regime (Table 2). The full DEA learning procedure is summarized in Algorithm 1.

## C ADDITIONAL EXPERIMENTAL RESULTS

This appendix provides additional experimental results for all MuJoCo and DMC environments across the two learning regimes defined in Table 2.

**Results in each learning regime.** Tables 5 and 6 presents performance metrics for DEA, REDQ, and SAC across five MuJoCo environments and nine DMC environments, under the two learning regimes.

In the interactive regime, DEA generally ranks best on average across MuJoCo, outperforming REDQ and SAC on most tasks and all three metrics. In DMC, however, REDQ often matches or surpasses DEA, particularly on locomotion tasks such as Cheetah-run and Humanoid-walk. SAC remains competitive in this regime, benefiting from its simplicity and robust performance with small ensembles, while REDQ performs less consistently, likely due to its reliance on averaging  $Q$ -values. Importantly, even in environments where DEA is outperformed, it never collapses, maintaining stable learning across all tasks. DEA’s strong results on MuJoCo under these constraints highlight the benefits of its directional aggregation mechanism.

In the sample-efficient regime, results are more balanced. DEA achieves the highest average rank in final return, but REDQ slightly outperforms in IQM and AULC, especially on DMC. DEA still maintains strong overall performance and outperforms SAC by a wide margin. REDQ benefits from larger ensembles and increased update frequency, narrowing the gap and in some environments surpassing DEA. SAC, in contrast, performs poorly in this setting, often collapsing when training budgets are tight.

Overall, these results show that DEA performs competitively across regimes, offering both adaptability and stability, though REDQ may have an edge in the sample-efficient setting. For a summarized cross-regime comparison, including aggregated metrics and average ranks, see Table 3.

**Learning curves.** Figures 2 to 5 show the full learning curves for all tasks under the interactive and sample-efficient learning regimes, respectively. Results are averaged over ten seeds, and shaded regions correspond to one standard deviation.

Table 6: Performance on DMC envs. for each learning regime (Table 2). Metrics are average final return, InterQuantile Mean (IQM) of the final return, and Area Under the Learning Curve (AULC), averaged over evaluation repetitions and ten seeds.  $\pm$  denotes standard deviation over seeds.

| <b>Interactive learning</b> (1M env. interactions, 2 critics, 1 update-to-data ratio) |               |               |               |               |              |              |      |      |     |
|---------------------------------------------------------------------------------------|---------------|---------------|---------------|---------------|--------------|--------------|------|------|-----|
| Environment                                                                           | Final Return  |               |               | IQM           |              |              | AULC |      |     |
|                                                                                       | DEA           | REDQ          | SAC           | DEA           | REDQ         | SAC          | DEA  | REDQ | SAC |
| Cheetah-run                                                                           | 802 $\pm$ 30  | 814 $\pm$ 105 | 784 $\pm$ 28  | 797 $\pm$ 13  | 844 $\pm$ 15 | 779 $\pm$ 14 | 624  | 646  | 613 |
| Hopper-hop                                                                            | 219 $\pm$ 44  | 242 $\pm$ 86  | 114 $\pm$ 89  | 228 $\pm$ 8   | 242 $\pm$ 17 | 80 $\pm$ 76  | 149  | 148  | 64  |
| Hopper-stand                                                                          | 789 $\pm$ 305 | 921 $\pm$ 99  | 753 $\pm$ 311 | 925 $\pm$ 16  | 940 $\pm$ 9  | 896 $\pm$ 50 | 602  | 730  | 428 |
| Humanoid-run                                                                          | 159 $\pm$ 36  | 180 $\pm$ 28  | 159 $\pm$ 18  | 164 $\pm$ 9   | 178 $\pm$ 13 | 159 $\pm$ 7  | 104  | 109  | 77  |
| Humanoid-stand                                                                        | 638 $\pm$ 265 | 728 $\pm$ 156 | 644 $\pm$ 151 | 686 $\pm$ 129 | 749 $\pm$ 89 | 616 $\pm$ 49 | 371  | 383  | 312 |
| Humanoid-walk                                                                         | 517 $\pm$ 92  | 557 $\pm$ 22  | 564 $\pm$ 89  | 529 $\pm$ 14  | 558 $\pm$ 10 | 563 $\pm$ 19 | 324  | 337  | 296 |
| Quadruped-run                                                                         | 823 $\pm$ 67  | 878 $\pm$ 59  | 852 $\pm$ 88  | 831 $\pm$ 28  | 891 $\pm$ 21 | 865 $\pm$ 33 | 631  | 653  | 637 |
| Quadruped-walk                                                                        | 914 $\pm$ 164 | 955 $\pm$ 36  | 848 $\pm$ 236 | 945 $\pm$ 15  | 945 $\pm$ 11 | 941 $\pm$ 17 | 777  | 757  | 714 |
| Walker-run                                                                            | 756 $\pm$ 33  | 779 $\pm$ 26  | 735 $\pm$ 49  | 764 $\pm$ 8   | 781 $\pm$ 11 | 740 $\pm$ 19 | 636  | 650  | 604 |

  

| <b>Sample-efficient learning</b> (300K env. interactions, 10 critics, 20 update-to-data ratio) |               |               |               |              |               |              |      |      |     |
|------------------------------------------------------------------------------------------------|---------------|---------------|---------------|--------------|---------------|--------------|------|------|-----|
| Environment                                                                                    | Final Return  |               |               | IQM          |               |              | AULC |      |     |
|                                                                                                | DEA           | REDQ          | SAC           | DEA          | REDQ          | SAC          | DEA  | REDQ | SAC |
| Cheetah-run                                                                                    | 823 $\pm$ 58  | 851 $\pm$ 48  | 596 $\pm$ 134 | 827 $\pm$ 9  | 866 $\pm$ 6   | 635 $\pm$ 26 | 614  | 654  | 436 |
| Hopper-hop                                                                                     | 130 $\pm$ 102 | 105 $\pm$ 113 | 1 $\pm$ 3     | 86 $\pm$ 75  | 54 $\pm$ 81   | 0 $\pm$ 1    | 74   | 62   | 0   |
| Hopper-stand                                                                                   | 779 $\pm$ 333 | 318 $\pm$ 431 | 5 $\pm$ 16    | 935 $\pm$ 16 | 109 $\pm$ 268 | 0 $\pm$ 1    | 556  | 250  | 4   |
| Humanoid-run                                                                                   | 145 $\pm$ 15  | 117 $\pm$ 43  | 1 $\pm$ 1     | 144 $\pm$ 5  | 131 $\pm$ 8   | 1 $\pm$ 1    | 79   | 57   | 1   |
| Humanoid-stand                                                                                 | 678 $\pm$ 145 | 539 $\pm$ 204 | 52 $\pm$ 117  | 665 $\pm$ 55 | 559 $\pm$ 31  | 9 $\pm$ 1    | 317  | 270  | 27  |
| Humanoid-walk                                                                                  | 478 $\pm$ 57  | 416 $\pm$ 147 | 2 $\pm$ 1     | 484 $\pm$ 14 | 454 $\pm$ 35  | 2 $\pm$ 1    | 239  | 196  | 2   |
| Quadruped-run                                                                                  | 823 $\pm$ 124 | 728 $\pm$ 260 | 209 $\pm$ 338 | 856 $\pm$ 19 | 847 $\pm$ 24  | 43 $\pm$ 52  | 611  | 540  | 189 |
| Quadruped-walk                                                                                 | 935 $\pm$ 58  | 878 $\pm$ 188 | 284 $\pm$ 385 | 947 $\pm$ 14 | 932 $\pm$ 16  | 112 $\pm$ 90 | 731  | 644  | 229 |
| Walker-run                                                                                     | 705 $\pm$ 100 | 631 $\pm$ 129 | 270 $\pm$ 130 | 741 $\pm$ 27 | 649 $\pm$ 56  | 258 $\pm$ 84 | 557  | 485  | 186 |

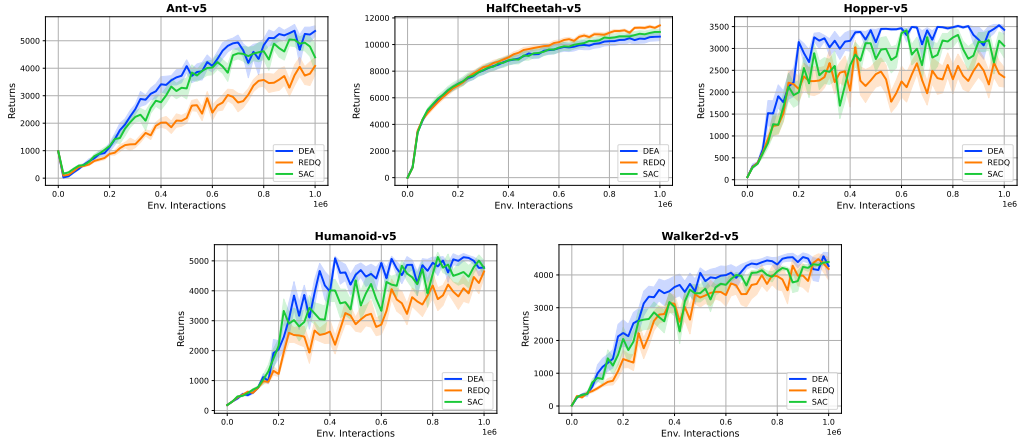

Figure 2: Learning curves for all MuJoCo tasks under the interactive learning regime (Table 2). Results are averaged over ten seeds, with shaded regions indicating one standard deviation.

DEA generally outperforms SAC and REDQ in their respective learning regimes. In the interactive regime, SAC remains competitive due to its simplicity and stability with small ensembles. However, as ensemble size and update frequency increase, its static conservative aggregation becomes overly restrictive, limiting both learning speed and final performance. Conversely, REDQ performs well in sample-efficient settings, where its high UTD ratio and large ensemble size support rapid learning, but it becomes less reliable in low-update regimes. DEA bridges this gap by learning to adjust its aggregation strategy dynamically based on ensemble disagreement and training context, achieving stable and robust performance across both regimes. Notably, DEA overall achieves top ranks, highlighting its effectiveness in learning under different UTD ratios and ensemble sizes.

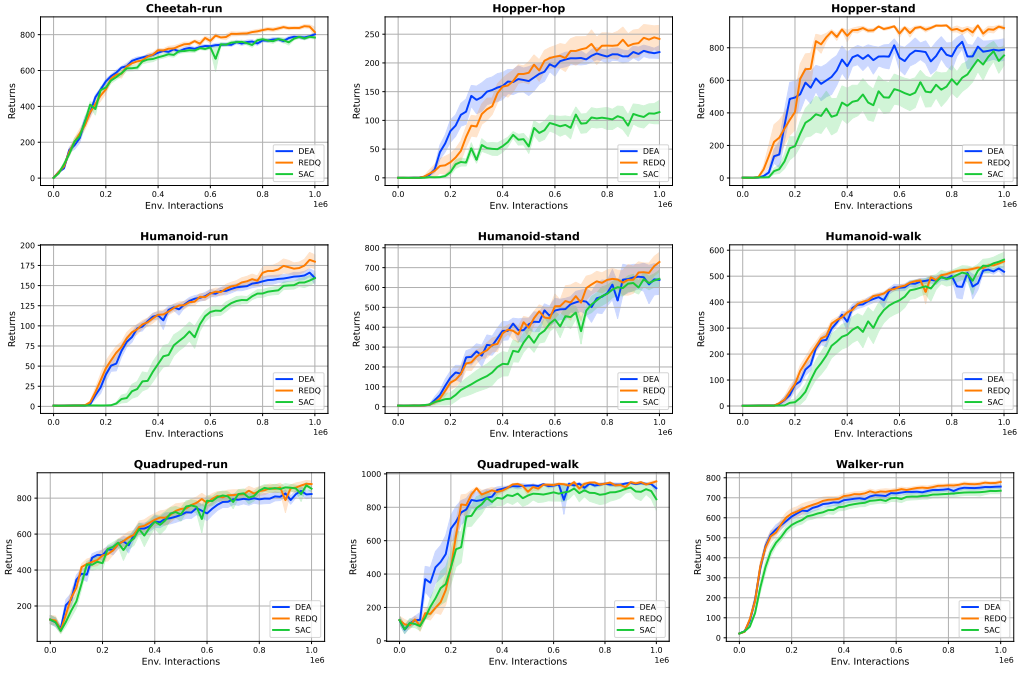

Figure 3: Learning curves for all DMC tasks under the interactive learning regime (Table 2). Results are averaged over ten seeds, with shaded regions indicating one standard deviation.

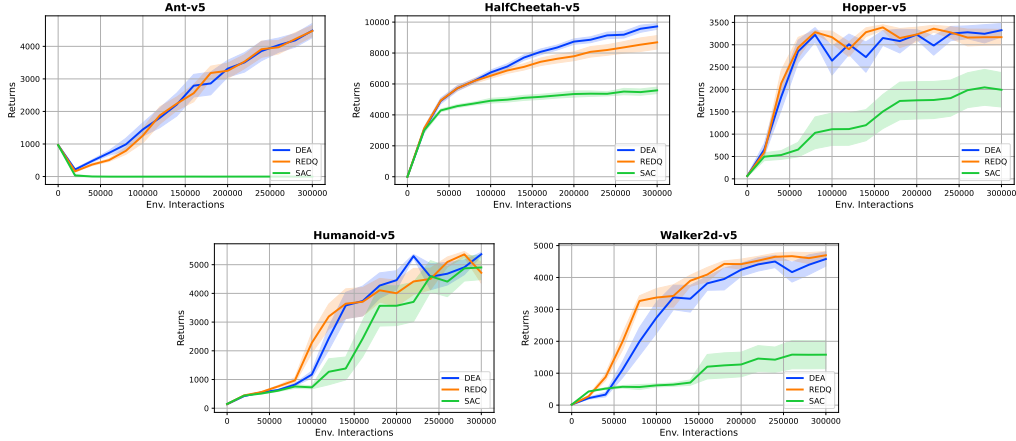

Figure 4: Learning curves for all MuJoCo tasks under the sample-efficient learning regime (Table 2). Results are averaged over ten seeds, with shaded regions indicating one standard deviation.

**Directional aggregation trajectories.** Figures 6 to 9 show the evolution of the learned directional aggregation parameters ( $\bar{\kappa}$  for the critic and  $\kappa$  for the actor) throughout training across the two learning regimes for each of the seeds. These figures illustrate how DEA adjusts aggregation behavior in response to training dynamics.  $\bar{\kappa}$  typically remains negative, anchoring conservative critic estimates, while  $\kappa$  tends to increase, supporting more explorative actor behavior.

**Ensemble disagreement trajectories.** Figures 10 to 13 show the evolution of ensemble disagreement in the critic throughout training across both learning regimes. Early in training, limited data and untrained critics result in high disagreement across the ensemble. As training progresses and the critics become more aligned, disagreement generally decreases, particularly, when measured relative to the increasing scale of the  $Q$ -values.

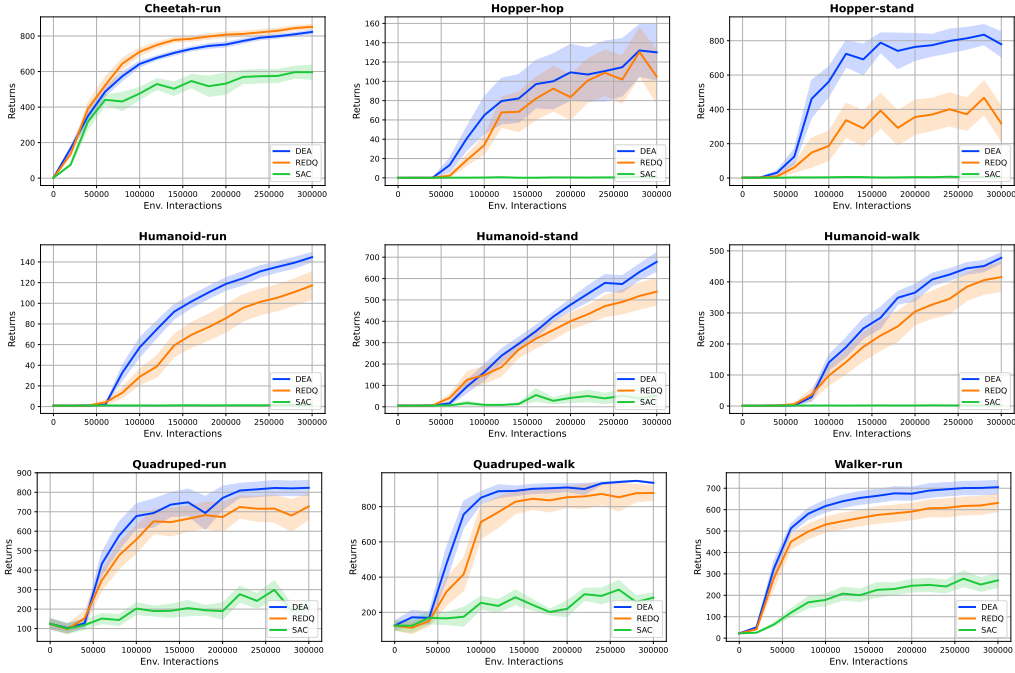

Figure 5: Learning curves for all DMC tasks under the sample-efficient learning regime (Table 2). Results are averaged over ten seeds, with shaded regions indicating one standard deviation.

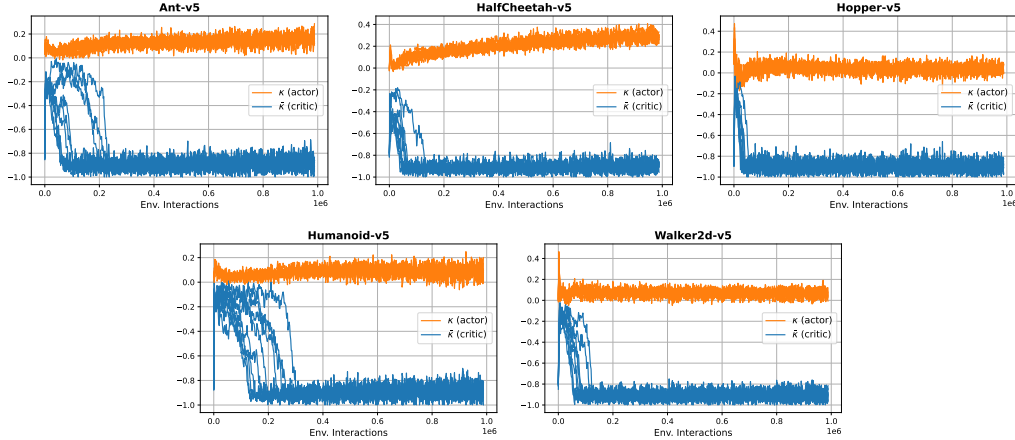

Figure 6: Trajectories of the directional aggregation parameters  $\bar{\kappa}$  (critic) and  $\kappa$  (actor) across seeds in MuJoCo environments under the interactive learning regime (Table 2).

## D ABLATION DETAILS

This appendix provides additional results for the ablation study on the initialization of the directional aggregation parameters, as discussed in Section 7. Specifically, we investigate the effect of different initial values for the critic-side parameter  $\bar{\kappa}$  while keeping the actor-side parameter fixed at  $\kappa = 0$ . This setup isolates the influence of  $\bar{\kappa}$  on learning performance and avoids confounding interactions between the two parameters.

All results presented in this section are based on a single seed (seed 1) in MuJoCo. The purpose of this ablation is not to assess overall performance but to explore the stability and qualitative behavior of DEA under varying initializations.

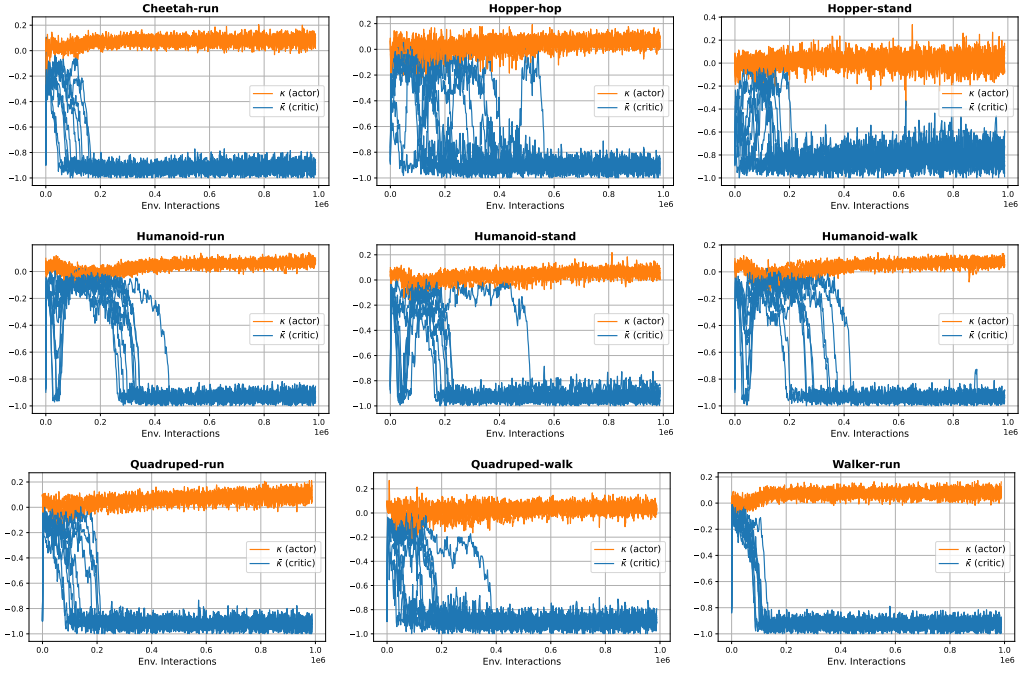

Figure 7: Trajectories of the directional aggregation parameters  $\bar{\kappa}$  (critic) and  $\kappa$  (actor) across seeds in DMC environments under the interactive learning regime (Table 2).

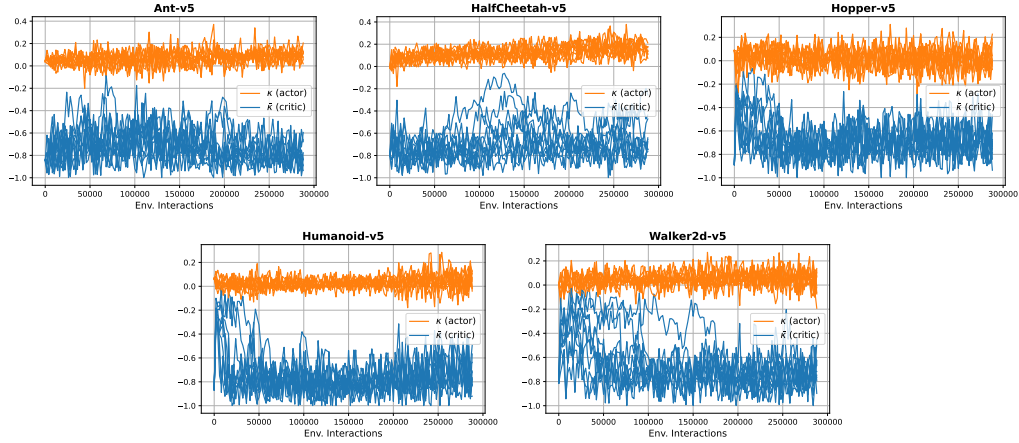

Figure 8: Trajectories of the directional aggregation parameters  $\bar{\kappa}$  (critic) and  $\kappa$  (actor) across seeds in MuJoCo environments under the sample-efficient learning regime (Table 2).

Figures 14 and 15 shows learning curves across MuJoCo environments in the two learning regimes, respectively. Each subplot compares DEA’s performance under different  $\bar{\kappa}$  initializations, including SAC and REDQ. As discussed in Section 7, initialization has a more pronounced effect in high-UTD settings, where early updates to  $\bar{\kappa}$  occur before new data is collected. Nevertheless, DEA remains stable across all settings, and in many instances still outperforms SAC and REDQ.

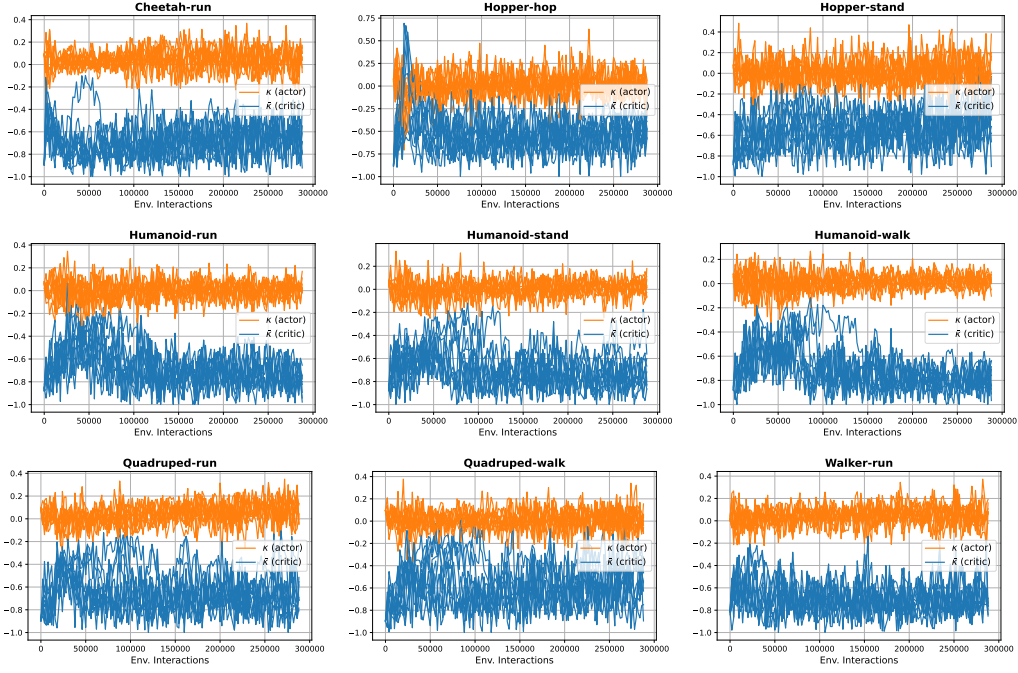

Figure 9: Trajectories of the directional aggregation parameters  $\bar{\kappa}$  (critic) and  $\kappa$  (actor) across seeds in DMC environments under the sample-efficient learning regime (Table 2).

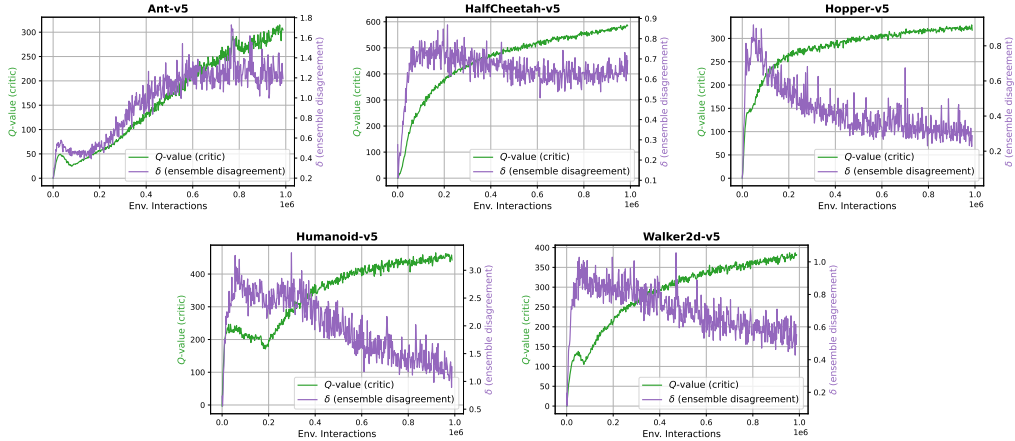

Figure 10: Trajectories of  $Q$ -values and ensemble disagreement for seed 1 in MuJoCo environments under the interactive learning regime (Table 2).

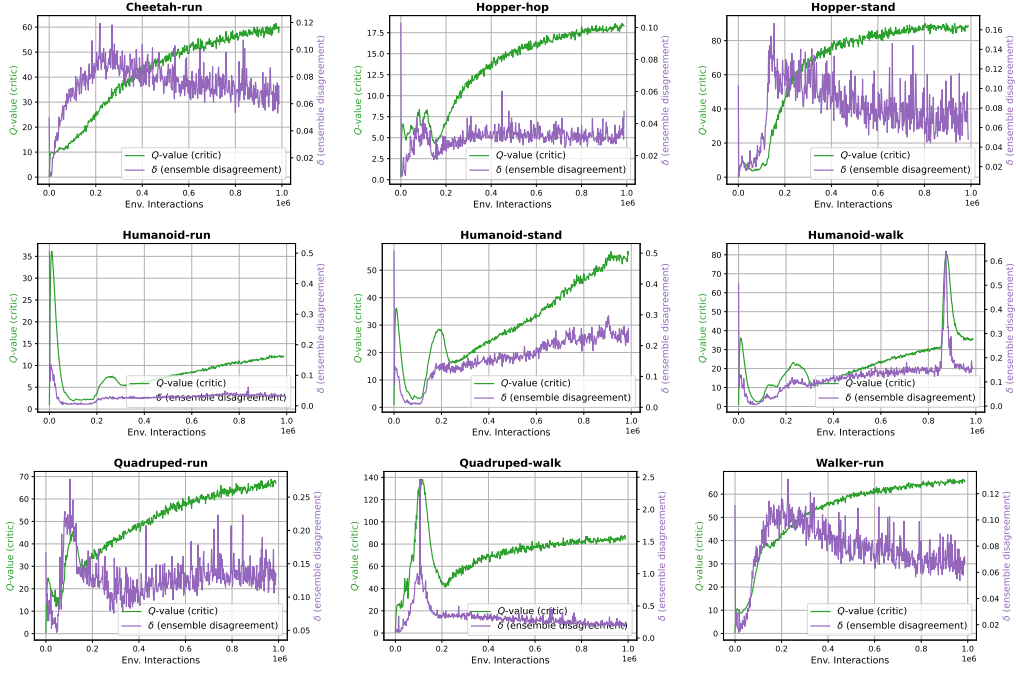

Figure 11: Trajectories of  $Q$ -values and ensemble disagreement for seed 1 in DMC environments under the interactive learning regime (Table 2).

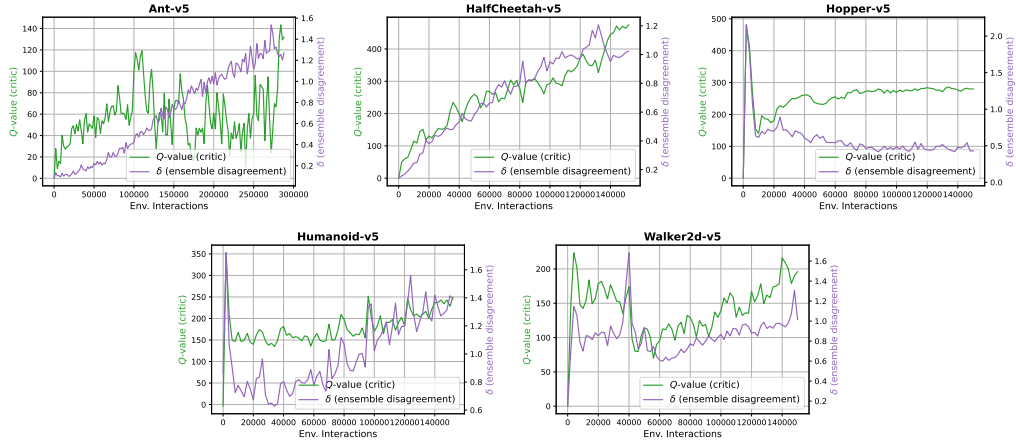

Figure 12: Trajectories of  $Q$ -values and ensemble disagreement for seed 1 in MuJoCo environments under the sample-efficient learning regime (Table 2).

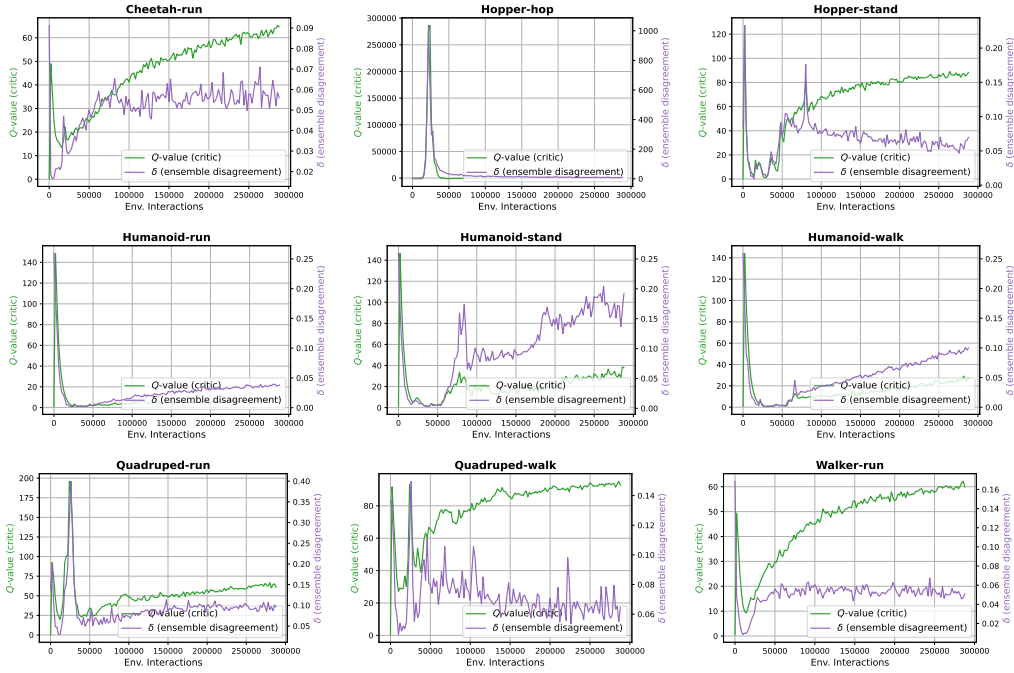

Figure 13: Trajectories of  $Q$ -values and ensemble disagreement for seed 1 in DMC environments under the sample-efficient learning regime (Table 2).

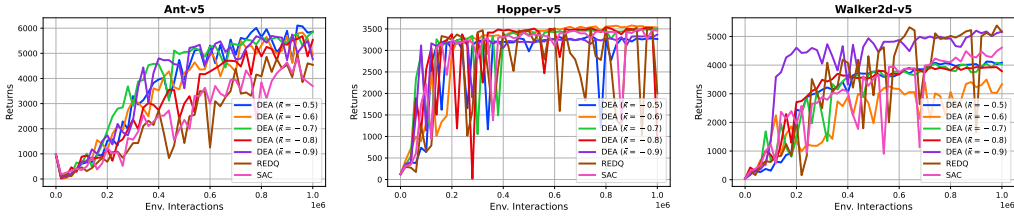

Figure 14: Effect of initializing the critic-side directional aggregation parameter  $\bar{\kappa}$  on DEA's performance across MuJoCo environments under the interactive learning regime (Table 2).

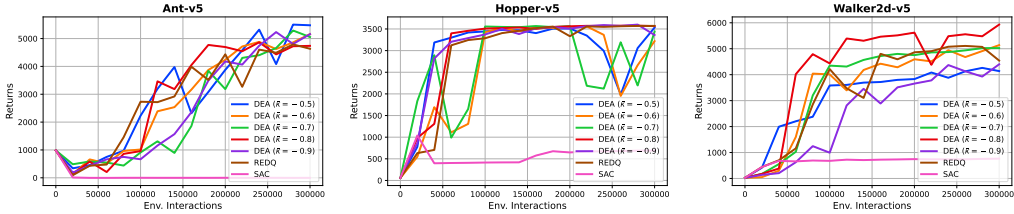

Figure 15: Effect of initializing the critic-side directional aggregation parameter  $\bar{\kappa}$  on DEA's performance across MuJoCo environments under the sample-efficient learning regime (Table 2).
